24 Total number of words: 4777

25

26 **Synopsis**

27 The oxidative stress and the post-translational modification of deamidation in lens crystallins

28 seem to play a significant role in the formation of age-related cataract in human.

29

30

## 31 Abbreviations

32

|                |                                                                    |
|----------------|--------------------------------------------------------------------|
| (GSH)          | Glutathione                                                        |
| (SH)           | Sulfhydryl                                                         |
| (PRISMA)       | Preferred Reporting Items for Systematic Reviews and Meta-Analyses |
| (WI-US)        | Water-insoluble-urea soluble                                       |
| (WI-UI)        | Water-insoluble-urea insoluble                                     |
| (ARNC)         | Age-related nuclear cataract                                       |
| (NEM)          | N-ethylmaleimide                                                   |
| (CM)           | Carboxymethyl                                                      |
| (HMW)          | High Molecular Weight                                              |
| (Gln)          | Glutamine                                                          |
| (FABP5)        | Fatty acid-binding protein                                         |
| (CRYAB)        | Alpha-crystallin B chain                                           |
| (BHMT1)        | Betaine-homocysteine S-methyltransferase-1                         |
| (RLSC)         | Regenerative lenses with secondary cataract                        |
| (CC)           | Congenital cataract                                                |
| (ARC)          | Age-related cataract                                               |
| (VEGF)         | Vascular endothelial growth factor                                 |
| (h $\gamma$ D) | human $\gamma$ D-crystallin                                        |

33

34

35

36 **Abstract**

37

38 **Purpose:** The aim of this systematic review is to identify all the available data on human lens  
39 proteomics with a critical role to age-related cataract formation in order to elucidate the  
40 physiopathology of the aging lens.

41 **Materials and methods:** We searched on Medline and Cochrane databases. The search  
42 generated 328 manuscripts. We included nine original proteomic studies that investigated  
43 human cataractous lenses.

44 **Results:** Deamidation was the major age-related post-translational modification. There was a  
45 significant increase in the amount of  $\alpha$ A-crystallin D-isoAsp58 present at all ages, while an  
46 increase in the extent of Trp oxidation was apparent in cataract lenses when compared to aged  
47 normal lenses. During aging, enzymes with oxidized cysteine at critical sites included  
48 GAPDH, glutathione synthase, aldehyde dehydrogenase, sorbitol dehydrogenase, and  
49 PARK7.

50 **Conclusion:** D-isoAsp in  $\alpha$ A crystallin could be associated with the development of age-  
51 related cataract in human, by contributing to the denaturation of a crystallin, and decreasing  
52 its ability to act as a chaperone. Oxidation of Trp may be associated with nuclear cataract  
53 formation in man, while the role of oxidant stress in age-related cataract formation is  
54 dominant.

55

56

## 57 Significance of the study

58

59 The crystallins undergo extensive post-translational modifications in order to interact and  
60 maintain the soluble basis for lenticular transparency. Severe perturbations of this balance of  
61 modifications and interactions lead to inappropriate protein folding, association and  
62 aggregation. Those protein aggregates, if a certain threshold is surpassed and perpetuated,  
63 diffract incident light leading to lens opacification and cataractogenesis. In addition, the  
64 crystallins in high concentration are more than physical structural components of the  
65 crystalline lens, and their protein species have additional multiple catalytical or regulatory  
66 functions affecting the transparency of the lens and thus, cataractogenesis. Therefore, it is  
67 necessary to understand the dynamics of this protein superfamily. Proteomics research is an  
68 ideal way to characterize the healthy lenticular protein constituents and elucidate the complex  
69 factors involved in cataractogenesis, given that the lens consists mainly of proteins and water.  
70 Although considerable advances have been made in the field, and significant proteomic  
71 studies have been published to date, this is a systematic review of all proteomic studies on  
72 cataractous human lens compared to healthy human lens. The present systematic review aims  
73 to shed light on the complex pathophysiology of cataractogenesis and set the basis for future  
74 research on possible prevention or even new non-invasive treatment of age-related cataract.

75

## 76 Introduction

77

78 Cataract is an opacification of normally clear crystalline lens that may cause a decrease in  
79 vision or even blindness if left untreated (1). Cataract is responsible for the 33% of blindness  
80 worldwide (2–4). Age is the most important aetiological factor of cataract, due to the  
81 cumulative damage of environmental insults on proteins and cells of the crystalline lens  
82 (5,6,7).

83 The lens fibers have a high protein content (~34%) and relatively low water content (~65%).  
84 The crystallins are water-soluble structural proteins of the lens fibers. Human crystallins are  
85 classified into three main types: alpha, beta and gamma crystallins. Beta and gamma  
86 crystallins are similar in sequence and structure, so they are grouped as a protein superfamily,  
87 the  $\beta\gamma$ -crystallins. The  $\alpha$ -crystallin family and  $\beta\gamma$ -crystallins represent the majority of proteins  
88 in the human lens fibers (8).

89 The crystallins need an antioxidant environment in order to remain soluble and maintain the  
90 transparency of the lens (6,9). In order to elucidate the complex factors involved in  
91 cataractogenesis, it is necessary to understand the dynamics of this protein superfamily and  
92 proteomics research is an ideal way to do so.

93 With the progress in proteomic analysis, proteomic approaches have been applied to identify  
94 proteins in various physiological or pathological conditions in the crystalline lens and analyze  
95 the proteome of cataractous or normal lenses. Moreover, various investigations on different  
96 aspects of the lens proteomics of different species have been carried out using a wide variety  
97 of proteomic techniques (10).

98 In particular, many studies were focused on lens proteomics of various species, such as mice.

99 In 2002, Ueda Y. et al. suggested that partial degradation of  $\alpha$ - and  $\beta$  -crystallins and  
100 increased acidity of  $\gamma$ -crystallins may cause insolubilisation during aging and they created 2-

101 DE proteome maps of mouse lens proteins in order to be compared with maps of lens proteins  
102 of mice with cataracts and facilitate the identification of cataract-specific modifications (11).  
103 In 2006, Hoehenwarter W. et al. published a review of eye lens proteomics that summarized  
104 crystallin modifications in the lens detected by proteomics techniques (9).  
105 In 2013, the Human Eye Proteome Project initiated with a principal goal the characterization  
106 of the proteome of the human eye. In 2013 there were 4,842 non-redundant proteins identified  
107 in the human eye. In 2018, an updated resource of 9,782 non-redundant proteins in the human  
108 eye was reported. Regarding the human lens, the number of known proteins in the human lens  
109 and zonule system was increased from 273 in 2013 to 1,117 known proteins to date (12).  
110 Although considerable advances have been made to clarify the pathophysiology of age-related  
111 cataract formation, additional high-quality data focused on the human lens need to be  
112 exported using proteomics. Thereby, it is necessary to collect and summarise all proteomic  
113 researches to date that provide data on cataractous human lens compared to a healthy human  
114 lens in order to elucidate the complex factors involved in cataractogenesis and suggest  
115 possible prevention or even new non-invasive treatment of age-related cataract.

116

## 117 Objective

118

119 The present systematic review aims to identify all the available data on human lens  
120 proteomics with a critical role to age-related cataract formation in order to elucidate the  
121 different physiopathological states that lead to the aging of the crystalline lens and thus,  
122 cataractogenesis.

123



## 124 Materials and Methods

125

126 A systematic review was conducted according to the Preferred Reporting Items for Systematic  
127 Reviews and Meta-Analyses (PRISMA) guidelines (13).

128

### 129 Eligibility criteria

130 In this systematic review were included English full-text peer-reviewed articles that used  
131 proteomics methodologies to study *in vivo* or *in vitro* human lens proteins and define possible  
132 pathways for age-related cataract formation.

133

134 In particular, studies were selected according to the criteria outlined below.

135

136 Type of studies: original English studies that used proteomic analysis were included.

137 Regarding geographical location, publication status or year of publication there were no  
138 limitations. Reviews and studies published in non-English language were excluded.

139

140 Type of participants: Age-related cataractous human lenses were the object under  
141 investigation of the included studies. Studies that set cataractous lenses of other species as the  
142 object under investigation were excluded.

143

144 Type of intervention: Mass spectrometry-based proteomic analysis, *in vivo* or *in vitro*, was  
145 used in the included studies. For the separation and isolation of proteins electrophoresis or  
146 other methods were used in the included studies.

147

148 Type of outcome: Aging of the crystalline lens and cataract formation was the outcome of  
 149 interest in the proteomic analysis. Articles that studied other types of cataract except for the  
 150 age-related one will be excluded.

151

152 The eligibility criteria are summarized in Table 1.

153

| <input type="checkbox"/>              | Include <input type="checkbox"/>                                                                  | Exclude <input type="checkbox"/>                                                                                |
|---------------------------------------|---------------------------------------------------------------------------------------------------|-----------------------------------------------------------------------------------------------------------------|
| Population <input type="checkbox"/>   | Humans                                                                                            | Other species                                                                                                   |
| Outcome                               | Aging of the crystalline lens- age-related cataract formation                                     | Other types of cataract                                                                                         |
| Methods                               | Proteomic methods<br>3D electrophoresis<br>Mass spectrometry (for protein structural information) | Other methods than proteomic techniques                                                                         |
| Study design <input type="checkbox"/> | Original Research<br>In vivo studies                                                              | Reviews <input type="checkbox"/> <input type="checkbox"/><br>Foreign language articles <input type="checkbox"/> |

154 *Table 1. Eligibility criteria*

155

## 156 [Information sources](#)

157 Searching electronic databases identified all the available studies. Primarily, two major  
 158 databases were used for the purposes of this review, PubMed/MEDLINE and Cochrane  
 159 Database of Systematic Reviews. Further search on PROSPERO for on-going systematic  
 160 reviews was conducted. Besides, we hand-searched contents pages of Journal of Vision and  
 161 Journal of Investigative ophthalmology & visual science. In order to ensure literature  
 162 completeness, we screened additionally the reference lists of the studies that were included in

163 our search. The literature search in the present systematic review was restricted to the English  
164 language and human subjects. References identified were imported in Mendeley Desktop  
165 software for deduplication.

166

## 167 [Search strategy](#)

168 Two reviewers independently screened the titles and the abstracts against the eligibility  
169 criteria. Our search strategy was based on proteomics and the biological context of interest  
170 (human crystalline lens). Our literature search strategies were developed using medical  
171 subject headings (MeSH) and free-text terms related to proteomics and crystalline lens. The  
172 “English” filter was applied via the Filter section.

173 We used the following search terms in all databases: proteomics; proteome; “proteom\*”;  
174 “proteomic analysis”; “proteomic study”; “lens, crystalline”; "Anterior Capsule of the Lens";  
175 "Posterior Capsule of the Lens"; "Lens Nucleus, Crystalline"; "Lens Cortex, Crystalline";  
176 "Lens Capsule, Crystalline"; "Crystallins"; "Cataract" and "Cataract, Age-Related Nuclear".  
177 The detailed research strategy can be found in Appendix 1.

178

## 179 [Study records](#)

### 180 [Data management](#)

181 Literature search results were uploaded to Covidence™. Our team members developed  
182 screening questions based on the eligibility criteria. Citation abstracts and full-text articles  
183 were uploaded to Covidence™ based on those screening questions.

184

### 185 [Study Selection process](#)

186 Two principal reviewers, independently working, screened the titles and abstracts of the  
187 results retrieved from our search strategy. Full-text forms were obtained for the potentially

188 eligible studies or in case of any uncertainty. Then, the two reviewers assessed the full-text  
189 forms and chose those that met the predefined inclusion criteria. In order to avoid data  
190 duplication, multiple publications from the same research group were not extracted (if  
191 reporting the same methodology and the same results); instead, the paper that provided the  
192 most robust evidence was chosen as the primary evidence source.  
193 Any potential disagreements were resolved through discussion with a senior reviewer. All the  
194 reasons for excluding studies were recorded. Neither of the principal reviewers nor the senior  
195 reviewer was blind to the journal titles or the study authors or institutions.

196

#### 197 [Data collection process](#)

198 The two principal reviewers using a predefined standardized form for data extraction  
199 accomplished data collection process. The first reviewer extracted the data from the included  
200 studies and the second one checked the extracted data. Reviewers resolved any disagreements  
201 by discussion; if no agreement could be reached a discussion with a senior reviewer was  
202 planned. Study authors were contacted if any uncertainty was present.

203

#### 204 [Data items](#)

205 Information was extracted from each study on:

- 206 • Study identification characteristics (authors, year of publication, trial registration code,  
207 country of origin, corresponding author's detail)
- 208 • Study Characteristics (the type of study: proteomic analysis)
- 209 • Type of methods used for separation and isolation of proteins (Electrophoresis or other  
210 methods)
- 211 • Type of methods used for the obtainment of protein identification, structural  
212 characterization and relative quantitation (Mass spectrometry)

213 • Results (any of the following: identified proteins, protein structural information, post-  
214 translational modifications, protein expression, protein function, protein localization,  
215 protein-protein interactions)

216 • Role of the identified protein in aging of the crystalline lens and cataract formation

217

## 218 [Assessment of risk of bias](#)

219 In order to assess the possible risk of bias for each eligible study while collecting data, we  
220 created a risk of bias tool based on several questions. The assessment tool covered the  
221 following domains: number of subjects, compliance with the manufacturer' instructions while  
222 applying the proteomic techniques, repetition of the experiment. The procedures that took  
223 place in each study were described, for each domain of the tool. Studies were rated as of 'high  
224 risk,' 'low risk,' or 'unclear risk.' Two independent reviewers conducted the assessment of  
225 the risk of bias, and any disagreement was solved by discussion and by consulting a senior  
226 reviewer.

227

## 228 [Synthesis of results](#)

229 A narrative summary of all the included studies was conducted. In case of missing data, we  
230 intended to contact the original authors of the study. Results were presented alongside overall  
231 judgments for concerns regarding the validity and imprecision of the result.

232

## 233 Results

234

### 235 Study selection

236 A total of nine studies were identified for inclusion in our systematic review. Our search  
237 provided a total of 328 citations. In particular, the search of Medline and Cochrane databases  
238 provided a total of 300 citations. After adjusting for duplicates still, 300 citations remained.  
239 Of these, 134 studies were discarded because they were irrelevant to our subject. After  
240 reviewing the abstracts of the rest 166 studies it appeared that 103 papers did not meet the  
241 inclusion criteria. The full texts of the rest 63 citations were examined in more detail. After  
242 checking the references of located, relevant papers and searching for studies that have cited  
243 these papers, 28 additional studies were identified. It appeared that further 82 studies did not  
244 meet the inclusion criteria, as described. Thus, nine studies met the inclusion criteria and were  
245 included in our systematic review. No unpublished relevant studies were obtained. The flow  
246 diagram of the study selection is shown in figure 1. The reasons for exclusion of the 237  
247 papers can be found in table 2. The reasons for exclusion of 82 references after reviewing  
248 their full text forms can be found in table 3. The full list of 328 citations can be found in  
249 Appendix 2. The exclusion reasons for each citation and the full list of 91 articles that were  
250 studied in more detail, can be found in Appendix 3. The full list of articles excluded after  
251 reviewing their full text forms, including exclusion reasons for each citation, can be found in  
252 Appendix 4.

253

254

255

256

| Reason                                               | Number of papers excluded on this basis |
|------------------------------------------------------|-----------------------------------------|
| Irrelevant studies                                   | 134                                     |
| Wrong study design (not an original proteomic study) | 12                                      |
| Wrong patient population (non-human lens)            | 43                                      |
| Wrong outcome (not age-related cataract)             | 48                                      |
| Total                                                | 237                                     |

257 *Table 2. Reasons for exclusion of 237 references identified in title and abstract screening for inclusion*

258

259

| Reason                                               | Number of papers excluded on this basis |
|------------------------------------------------------|-----------------------------------------|
| Wrong study design (not an original proteomic study) | 26                                      |
| Wrong patient population (non-human lens)            | 8                                       |
| Wrong outcome (not age-related cataract)             | 41                                      |
| Method limitation                                    | 7                                       |
| Total                                                | 82                                      |

260 *Table 3. Reasons for exclusion of 82 references after reviewing their full text*

261

## 262 [Study characteristics](#)

263 The included studies were published between 2005 and 2017. Of those, three were conducted

264 in U.S.A and six in Australia.

265 Methods: All nine studies finally selected for the review were proteomic analysis studies

266 published in English. All of them used Mass Spectrometry.

267 Participants: The included studies involved human lenses.

268 Intervention: They performed proteomic analysis to compare normal human lenses to  
269 cataractous human lenses.

270 Outcomes: The included studies obtained information on proteins with a key role in the aging  
271 of the crystalline lens. In all studies, the primary outcome assessed was this information,  
272 which was either identified proteins, or protein structural characteristics, or post-translational  
273 modifications, or protein expression, or protein function, or protein localization, or protein-  
274 protein interactions.

275

#### 276 Risk of bias within studies

277 The conditions in basic science studies could be completely controlled, in contrast to the  
278 clinical studies. As a result, the risk of bias is minimum in basic science studies. However, we  
279 created a risk of bias tool to assess the included studies.

280 The results can be found in table 4.

281



282

| Studies                             | Number of subjects | Compliance with the manufacturer' instructions | Risk of bias |
|-------------------------------------|--------------------|------------------------------------------------|--------------|
| Wilmarth et al. (2005)              | 4                  | yes                                            | low          |
| Hains P.G. and Truscott R.J. (2007) | 6                  | yes                                            | low          |
| Hains P.G. and Truscott R.J. (2008) | 10                 | yes                                            | low          |
| Hains P.G. and Truscott R.J. (2010) | 10                 | yes                                            | low          |
| Hooi et al. (April 2012)            | Unclear (>4)       | yes                                            | low          |
| Hooi et al. (May 2012)              | Unclear (>4)       | yes                                            | low          |
| Hooi et al. (November 2012)         | Unclear (>4)       | yes                                            | low          |
| Fan et al. (2015)                   | 8                  | yes                                            | low          |
| Wang et al. (2017)                  | 6                  | yes                                            | low          |

283 *Table 4. Risk of bias within studies*

284

## 285 Results of individual studies

286 All nine studies revealed precious information regarding lens aging and cataract formation. A  
 287 graphical illustration of the results can be found in figure 2 in appendix 5.

288

289 Wilmarth et al. (2005) (14) created a comprehensive map of post-translational modifications  
 290 (PTM) in human lens, analyzing three aged lenses, two of which had moderate cataract, and  
 291 one young control lens. They identified 155 age-related crystalline PTM sites, including 78

292 previously unreported sites. Based on their results, large numbers of asparagine and glutamine  
293 sites were found to be significantly more deamidated in the water-insoluble  
294 proteins of aged lenses and deamidation was found to be the major age-related PTM. They  
295 also confirmed the far greater extent of S-methylation known in lens, while there was no  
296 methylation in the 3-day-old lens. They identified specific Carboxymethyl lysine (CML) and  
297 carboxyethyl lysine (CEL) sites in lens crystallins, which are advanced glycation end products  
298 and have been suggested as general markers of advanced age and oxidation, although these  
299 modifications were far less abundant than deamidation or methylation.

300

301 Hains P.G. and Truscott R.J. (2007) (15) compared PTMs present in young, aged, and  
302 cataractous lenses, analysing a total of six human lenses, two young lenses (34, 35 years old),  
303 two aged (72, 77 years old), and two early-stage nuclear cataract (70, 80 years old). The  
304 researchers found that the proteins from all lenses contained numerous sites of deamidation,  
305 oxidation, Cys-methylation, and acetylation. Deamidation was the most common PTM. An  
306 increase in the extent of Trp oxidation was apparent in cataract lenses when compared to aged  
307 normal lenses. Methylation of Cys in lens proteins was also reported (five Cys residues were  
308 detected as being modified in the young lens group, four in the old normal lenses, and three in  
309 the cataract lenses). A new phosphorylation site, in  $\gamma$ S-crystallin (S89) was identified in one  
310 of the young lenses, while, no phosphorylated Ser residues were detected in  $\alpha$ B-crystallin  
311 from the cataract lenses, whereas up to four were observed in the young and aged normal lens  
312 samples. One new  $\beta$ B1-crystallin truncation was identified in both the aged normal and  
313 cataract lenses. No Arg+55 Da modifications were detected in the cataract lenses.  
314 Finally, Carboxymethyl lysine was detected in all lens groups, two in young, and one each in  
315 aged and cataract lenses.

316

317 Hains P.G. and Truscott R.J. (2008) (16) examined the lens proteome using foetal (two sets),  
318 aged normal (three, 59, 65 and 80 year old), and advanced nuclear cataract lenses (three 60,  
319 65 and 80 year old). They identified 231 proteins across all lens samples, of which 183 in  
320 foetal, 103 in adult normal and 105 in cataractous lenses. Of those, 60 proteins were found to  
321 be common to all lens, while 22 previously unreported proteins were identified in normal  
322 aged and 29 in cataract lenses. They stated as well that for most of the proteins presented, the  
323 relative abundance of foetal lens proteins was greater than either of the other lens groups, with  
324 the exception of phakinin (BFSP2\_HUMAN), protein DJ-1 (PARK7\_HUMAN) and  
325 phosphoglycerate kinase 1 (PGK1\_HUMAN), where both cataract and aged normal lenses  
326 had greater relative abundance.

327 In addition to this, they reported that several proteins had a high abundance in the foetal lens  
328 group but a much reduced level in both adult lens groups, including betaine– homocysteine S-  
329 methyltransferase 1 (BHMT1\_HUMAN), bA2-crystallin (CRBA2\_HUMAN), bB3-crystallin  
330 (CRBB3\_HUMAN), gC-crystallin (CRGC\_HUMAN), glycer-aldehyde- 3-phosphate  
331 dehydrogenase (G3P\_HUMAN), per oxiredoxin-6 (PRDX6\_HUMAN) and vimentin  
332 (VIME\_HUMAN).

333

334 Hains P.G. and Truscott R.J. (2010) (17) characterized the sites of deamidation in all the  
335 major crystallins in the human lens using two sets of fetal lenses, each containing two lenses  
336 (set 1, 2 lenses, 17 weeks' gestation; set 2, 1 lens, 17.5 weeks' gestation plus 1 lens, 19  
337 weeks' gestation), three normal (59, 65, 80 years) lenses, and three nuclear cataractous lenses  
338 (60, 65, 80 years).

339 Firstly, they stated that the number of deamidated residues varies considerably between the  
340 various crystallins. In  $\beta$ B2- and  $\gamma$ C-crystallin, only one residue was found to be  
341 deamidated in the aged normal lenses. By contrast, nine sites of deamidation were found in

342  $\beta$ B1-, eight in  $\beta$ A4-, five in  $\gamma$ -S, and six in  $\beta$ A1/A3-crystallin.

343 Moreover, the researchers reported that the extent of deamidation varied substantially. Some  
344 crystallins from older lenses contained sites that were almost totally deamidated. These  
345 included  $\beta$ A1/A3-,  $\beta$ A4-,  $\gamma$ S-, and  $\gamma$ D-crystallins. In  $\beta$ B2-crystallins, the most highly  
346 deamidated residue in older normal lenses was Gln146, and the extent of deamidation was  
347 approximately 3%. In  $\alpha$ A-crystallin, the most deamidated sites were Asn123 and Gln126, and  
348 the extent of deamidation was approximately 10%.

349 They also observed that the sites of deamidation were often localized to discrete regions. In  
350  $\alpha$ A-crystallin, deamidation was found only in the putative C-terminal domain. In  $\beta$ A1/A3-  
351 crystallin, the most substantial deamidation was found at three sites contained within a region  
352 spanning residues 103 to 133. In  $\gamma$ C-crystallin, the only site of deamidation was localized to  
353 the peptide bridging the two domains. In most cases, the most highly deamidated sites were  
354 those of Asn residues.

355 Finally, in their study, some sites ( $\alpha$ A, Q147;  $\alpha$ B, N78, Q108;  $\beta$ A4, Q64, N82;  $\beta$ B1, N67,  
356 N69;  $\gamma$ C, N24;  $\gamma$ D, N160;  $\gamma$ S, N14, Q16, N76) showed increased levels of deamidation in  
357 ARNC cataractous lenses.

358

359 Hooi et al. (April 2012) (18) studied age-dependent changes in one crystallin representative  
360 from each of the two major lens protein groups ( $\alpha$  and  $\beta/\gamma$  crystallin families). The first was  
361 an Asp residue in  $\alpha$ A crystallin (Asp 151), because it had been shown to be significantly  
362 racemised in old human lenses and the second was an Asn residue in  $\gamma$ S crystalline (Asn 76)  
363 because it was found to be almost twice as deamidated in 60- to 70-year-old cataract lenses as  
364 in normal controls. The authors examined lenses across the age range and compared the  
365 extent of modification at both sites. For  $\alpha$ A-crystallin, there was no significant difference in  
366 Asp 151 racemization between cataract and normal lenses. By contrast, in  $\gamma$ S-crystallin the

367 degree of conversion of Asn 76 to isoAsp in cataract lenses was approximately double that of  
368 normal lenses at every age.

369

370 Hooi M.Y. et al. (May 2012) (19) characterized a site of glutamine (Gln) deamidation in  $\gamma$ S-  
371 crystallin and monitored its rate of conversion to Glu92 as a function of time and compared  
372 this with deamidation of Gln170 and Glns in b-sheet regions of the protein. They showed that  
373 there was a linear increase in the proportion of deamidation until teenage years, while there  
374 was no further increase for the next 50 years. They found no significant difference in the  
375 extent of Gln92 and Gln170 deamidation between cataract and age-matched normal lenses.

376

377 Hooi et al. (November 2012) (20) investigated the racemisation of Asp 58 in the most  
378 abundant structural protein in the human lens,  $\alpha$ A-crystallin, comparing normal and  
379 cataractous human lenses. They stated that there was a significant increase in the amount of  
380 D-isoAsp58 present at all ages. This was most evident during the early years, when age-  
381 related cataract is first observed (the average value for D-isoAsp in cataract lenses was almost  
382 26 % compared to normal lenses, almost 12 %).

383

384 Fan et al. (2015) (21) created the LEGSKO mouse in which lenticular GSH was lowered by  
385 knocking out the  $\gamma$ -glutamyl cysteine ligase subunit Gclc, in order to mimic the oxidative  
386 process and formation of protein disulfides linked to low concentrations of glutathione  
387 (GSH) in the nucleus of the human lens. These LEGSKO mice developed nuclear cataract by  
388 about 9 months. In order to test whether sites of disulfide bond formation are similar in mouse  
389 and human age-related cataract, the researchers performed the first comparative analysis of  
390 the cataract prone LEGSKO mouse and human aging and cataractous lens crystallin  
391 disulfidome, and compared the results with the disulfidome from mouse lens homogenate

392 oxidized in vitro with H<sub>2</sub>O<sub>2</sub> as a model of crystallin aggregation and opacification. They used  
393 as control 3 young normal human lens nuclei (at 15, 7, and  
394 3 years of age), and 3 old normal human lens nuclei (at 74, 72, and 68  
395 years of age). They used as well 9 cataractous lenses, 3 in each category of grade II-V of Lens  
396 Opacities Classification System III. The age of grade II group was 64, 67, and 60 years old,  
397 the grade III was 60, 59, and 69 years old, the grade IV was 56, 63, and 77 years old, and the  
398 grade V was 75, 80, and 78 years old.

399 Fan et al. first studied which proteins are associated with intra- versus intermolecular  
400 disulfide-bond in old normal versus young human lens, and they determined how these  
401 compared with those detected in oxidatively stressed, precataractous LEGSKO mouse lens.  
402 Then they studied how crystallin disulfides found in human cataracts compare with those  
403 detected in glutathione-depleted LEGSKO mouse cataracts and mouse lens proteins  
404 undergoing in vitro oxidation.

405 Based on their findings, there was evidence of age-related shift from intra- to intermolecular  
406 disulfide formation in human and LEGSKO Mouse Lens Crystallins, since over 25  
407 intramolecular disulfide bond protein spots and less than six intermolecular disulfide protein  
408 spots were identified in 4 year old lens, whereas in 67 year old human lens, less than four  
409 intramolecular disulphide and more than 20 intermolecular disulfide proteins spots were  
410 identified, in combination with a similar shift in spot pattern in the old versus young WT  
411 mouse and with the fact that the intra- to intermolecular disulfide shift had already occurred at  
412 5mos in the precataractous, GSH suppressed, LEGSKO mouse lens when compared with the  
413 5 months old WT lens.

414 Furthermore, 4 types of cysteine residues were identified based on their susceptibility to  
415 oxidation with age and as a function of presence and severity of cataract graded from II to V.  
416 The first includes cysteine residues that are mildly oxidized with age and not further oxidized

417 in cataracts (Cys67 in  $\beta$ B2, Cys19 in  $\gamma$ D, Cys109 in  $\gamma$ C, Cys99 in  $\beta$ A4 and Cys185 of  $\beta$ A1/3);  
418 the second includes cysteine residues with mild oxidation in old normal lenses but massive  
419 increase in cataracts regardless of cataract severity (Cys42 in  $\gamma$ D, Cys52 and Cys170 in  
420  $\beta$ A1/3, Cys38 in  $\beta$ B2 and Cys83 in  $\gamma$ S); the third includes cysteine residues with oxidation in  
421 old normal lenses and further increase in cataract lenses (Cys33 in  $\beta$ A4, Cys80 in  $\beta$ B1, and  
422 Cys23 in  $\gamma$ C), and the fourth includes cysteine residues that are barely oxidized with age but  
423 oxidized in cataracts, and also associated with cataract severity (Cys154 in  $\gamma$ C, Cys117 in  
424  $\beta$ A1/3, Cys115, and Cys130 in  $\gamma$ S, Cys33 in  $\gamma$ D, Cys42 and Cys78/ Cys79 in  $\gamma$ C).

425

426 Wang et al. (2017) (22) extended their previous study (Fan et al. 2015) in order to identify all  
427 noncrystallin disulfides that are common to human and LEGSKO mouse cataracts and in their  
428 in vitro oxidation, the sites and patterns of these cysteine residues that are oxidized during  
429 aging and oxidation, and the potential impact on lens biology based on their molecular  
430 functions. Their results showed that enzymes with oxidized cysteine at critical sites included  
431 GAPDH (hGAPDH, Cys247), glutathione synthase (hGSS, Cys294), aldehyde dehydrogenase  
432 (hALDH1A1, Cys126 and Cys186), sorbitol dehydrogenase (hSORD, Cys140, Cys165, and  
433 Cys179), and PARK7 (hPARK7, Cys46 and Cys53). They stated that extensive oxidation was  
434 also present in lens-specific intermediate filament proteins, such as BFSP1 and BFSP12  
435 (hBFSP1 and hBFSP12, Cys167, Cys65, and Cys326), vimentin (mVim, Cys328),  
436 cytokeratins, the majority of which were positively associated with degrees of cataract  
437 severity (Cys51, Cys77, and Cys474 in keratin 6A; Cys42 and Cys489 in keratin 2; Cys25,  
438 Cys66, and Cys427 in keratin 10; Cys55 and Cys474 in keratin 5; Cys432 in keratin 9; Cys40,  
439 Cys18, and Cys389 in keratin 14; and Cys49 and Cys497 in keratin 1), as well as  
440 microfilament and microtubule filament proteins, such as tubulin and actins.

441

442

## 443 Discussion

444

### 445 Summary of evidence

446 Deamidation was found to be the major age-related PTM and large numbers of asparagine and  
447 glutamine sites were found to be significantly more deamidated in the water-insoluble  
448 proteins of aged lenses. Some crystallins from older lenses contained sites were almost totally  
449 deamidated, including  $\beta$ A1/A3-,  $\beta$ A4-,  $\gamma$ S-, and  $\gamma$ D-crystallins. Some sites showed increased  
450 levels of deamidation in ARNC cataractous lenses. No significant difference in the extent of  
451 Gln92 and Gln170 deamidation of  $\alpha$ A-crystallin in D-isoAsp58 between cataract and age-  
452 matched normal lenses.

453 There was a significant increase in the amount of  $\alpha$ A-crystallin in D-isoAsp58 present at all  
454 ages. This was most evident during the early years, when age-related cataract is first  
455 observed.

456 An increase in the extent of Trp oxidation was apparent in cataract lenses when compared to  
457 aged normal lenses. No phosphorylated Ser residues were detected in  $\alpha$ B-crystallin from the  
458 cataract lenses, whereas up to four were observed in the young and aged normal lens samples.  
459 One new  $\beta$ B1-crystallin truncation was identified in both the aged normal and cataract lenses.  
460 No Arg+55 Da modifications were detected in the cataract lenses.

461 Twenty-two previously unreported proteins were identified in normal aged and 29 in cataract  
462 lenses. Phakinin, protein DJ-1 and phosphoglycerate kinase 1, where both cataract and aged  
463 normal lenses had greater relative abundance comparing to foetal lenses. Several proteins had  
464 a high abundance in the foetal lens group but a much reduced level in both adult lens groups,  
465 including betaine– homocysteine S-methyltransferase 1, bA2-crystallin, bB3-crystallin, gC-  
466 crystallin, glycer-aldehyde- 3-phosphate dehydrogenase, per oxiredoxin-6 and vimentin.

467 There was evidence of age-related shift from intra- to intermolecular disulfide formation in



468 human and LEGSKO Mouse Lens Crystallins.

469 Four types of cysteine residues were identified based on their susceptibility to oxidation with  
470 age and as a function of presence and severity of cataract graded from II to V. The first  
471 includes cysteine residues that are mildly oxidized with age and not further oxidized in  
472 cataracts; the second includes cysteine residues with mild oxidation in old normal lenses but  
473 massive increase in cataracts regardless of cataract severity; the third includes cysteine  
474 residues with oxidation in old normal lenses and further increase in cataract lenses, and the  
475 fourth includes cysteine residues that are barely oxidized with age but oxidized in cataracts,  
476 and also associated with cataract severity.

477 Enzymes with oxidized cysteine at critical sites included GAPDH, glutathione synthase,  
478 aldehyde dehydrogenase, sorbitol dehydrogenase, and PARK7. They stated that extensive  
479 oxidation was also present in lens-specific intermediate filament proteins, such as BFSP1 and  
480 BFSP12, vimentin, cytokeratins, the majority of which were positively associated with  
481 degrees of cataract severity, as well as microfilament and microtubule filament proteins, such  
482 as tubulin and actins.

483

## 484 [Limitations](#)

485 The present systematic review should be interpreted within the context of its strengths and  
486 limitations.

487 Outcome level: The main limitation of this systematic review is that the outcome of interest is  
488 not the same across studies.

489 Study and review level: Our study has some limitations. The quality of the included studies  
490 showed a low risk of bias although four studies included a small number of subjects/lenses.  
491 However, all studies used proteomic analysis that has a tremendous favorable potential for  
492 detecting candidate proteins and, so, facilitating the development of precision medicine for

493 diseases such as age-related cataract.

494

## 495 Conclusion

496 The results of Hooi et al. showed that in the case of Gln92 and Gln170, the degree of  
497 deamidation did not differ significantly between cataract and age-matched normal lenses and  
498 this may suggest that these particular modifications may contribute to age-related changes to  
499 the physical properties of the human lens, but not to cataractogenesis. Their result that there is  
500 a consistently greater extent of deamidation of Asn 76 in  $\gamma$ S-crystallin in all cataract lenses  
501 compared with their age-matched controls, suggests that this modification, along with others,  
502 such as deamidation at Asn 14 and Gln16, could be associated with the development of age-  
503 related cataract in human. In addition to this, there was a consistently greater formation of D-  
504 isoAsp in  $\alpha$ A crystalline from cataract lenses compared with age-matched normal lenses,  
505 suggesting that it could as well be associated with the development of age-related cataract in  
506 human. Such a dominant age-related modification may contribute to the denaturation of a  
507 crystallin, and its ability to act as a chaperone.

508 Based on the results from their proteome analysis of human foetal, aged and advanced nuclear  
509 cataract lenses, Hains and Truscott suggested there are no major differences between aged  
510 normal and advanced cataract lenses in terms of proteins present.

511 The results of their other study showed that the level of Trp oxidation appeared to increase in  
512 cataract lenses when these were compared to age-matched normal lenses and this may  
513 indicate that oxidation of Trp may be associated with nuclear cataract formation in man.

514 Deamidation appears to be important for protein denaturation in the aging lens and it is  
515 possible that the few sites they observed to be differentially deamidated in cataractous lenses  
516 may be sufficient to cause opacification.

517 The results of Wilmarth et al. show that large numbers of asparagine and glutamine sites were

518 significantly more deamidated in the water-insoluble proteins of aged lenses, and since  
519 cataract can be thought of as a crystallin insolubility disease, modifications exclusively  
520 associated with water-insoluble proteins may have implications in cataract formation.  
521 Finally, the results of Wang et al. and fan et al. support the important role of oxidant stress in  
522 age-related cataract formation, and in particular, the importance of GSH and that  
523 pharmacological GSH mimetics are probably needed to protect the aging lens from oxidation.  
524

525 **Aknowledgment**

526

527 We thank Anastasios Varypatis for helping us design the graphical illustration.

528

529 **Funding**

530

531 This research did not receive any specific grant from funding agencies in the public,

532 commercial, or not-for-profit sectors.

533

534 **Declaration of interest**

535

536 The authors report no conflicts of interest. The authors alone are responsible for the content

537 and writing of this article.

538

539

## 540 References

541

- 542 1. Crystalline Lens and Cataract by Joah F. Aliancy and Nick Mamalis – Webvision  
543 [Internet]. [cited 2018 Sep 27]. Available from:  
544 [https://webvision.med.utah.edu/book/part-xvi-anterior-segment/crystalline-lens-and-](https://webvision.med.utah.edu/book/part-xvi-anterior-segment/crystalline-lens-and-cataract/)  
545 [cataract/](https://webvision.med.utah.edu/book/part-xvi-anterior-segment/crystalline-lens-and-cataract/)
- 546 2. Pascolini D, Mariotti SP. Global estimates of visual impairment: 2010. *Br J*  
547 *Ophthalmol* [Internet]. 2012 May [cited 2018 Oct 6];96(5):614–8. Available from:  
548 <http://www.ncbi.nlm.nih.gov/pubmed/22133988>
- 549 3. Zetterberg M, Celojevic D. Gender and Cataract – The Role of Estrogen. *Curr Eye Res*  
550 [Internet]. 2015 Feb 2 [cited 2018 Oct 6];40(2):176–90. Available from:  
551 <http://www.ncbi.nlm.nih.gov/pubmed/24987869>
- 552 4. Resnikoff S, Pascolini D, Etya'ale D, Kocur I, Pararajasegaram R, Pokharel GP, et al.  
553 Global data on visual impairment in the year 2002. *Bull World Health Organ* [Internet].  
554 2004 Nov [cited 2018 Oct 6];82(11):844–51. Available from:  
555 <http://www.ncbi.nlm.nih.gov/pubmed/15640920>
- 556 5. Prokofyeva E, Wegener A, Zrenner E. Cataract prevalence and prevention in Europe: a  
557 literature review. *Acta Ophthalmol* [Internet]. 2013 Aug 1 [cited 2018 Oct  
558 6];91(5):395–405. Available from: [http://doi.wiley.com/10.1111/j.1755-](http://doi.wiley.com/10.1111/j.1755-3768.2012.02444.x)  
559 [3768.2012.02444.x](http://doi.wiley.com/10.1111/j.1755-3768.2012.02444.x)
- 560 6. Ottonello S, Foroni C, Carta A, Petrucco S, Maraini G. Oxidative Stress and Age-  
561 Related Cataract. *Ophthalmologica* [Internet]. 2000 [cited 2018 Oct 14];214(1):78–85.  
562 Available from: <http://www.ncbi.nlm.nih.gov/pubmed/10657746>
- 563 7. Truscott RJW. Age-related nuclear cataract—oxidation is the key. *Exp Eye Res*  
564 [Internet]. 2005 May [cited 2018 Oct 7];80(5):709–25. Available from:

- 565 <http://www.ncbi.nlm.nih.gov/pubmed/15862178>
- 566 8. anatomy & physiology of lens [Internet]. [cited 2018 Oct 7]. Available from:
- 567 <https://www.slideshare.net/rakeshjaiswal10/anatomy-physiology-of-lens>
- 568 9. Hoehenwarter W, Klose J, Jungblut PR. Eye lens proteomics. Amino Acids [Internet].
- 569 2006 Jun 4 [cited 2018 Oct 23];30(4):369–89. Available from:
- 570 <http://www.ncbi.nlm.nih.gov/pubmed/16583312>
- 571 10. Psatha K, Kollipara L, Voutyraki C, Divanach P, Sickmann A, Rassidakis GZ, et al.
- 572 Deciphering lymphoma pathogenesis via state-of-the-art mass spectrometry-based
- 573 quantitative proteomics. J Chromatogr B [Internet]. 2017 Mar 15 [cited 2018 Dec
- 574 9];1047:2–14. Available from:
- 575 <https://www.sciencedirect.com/science/article/pii/S1570023216306432>
- 576 11. Association for Research in Vision and Ophthalmology. Y, Duncan MK, David LL.
- 577 Investigative ophthalmology & visual science. [Internet]. Vol. 43, Investigative
- 578 Ophthalmology & Visual Science. [Association for Research in Vision and
- 579 Ophthalmology, etc.]; 2002 [cited 2018 Oct 23]. 205-215 p. Available from:
- 580 <https://iovs.arvojournals.org/article.aspx?articleid=2123357>
- 581 12. Ahmad MT, Zhang P, Dufresne C, Ferrucci L, Semba RD. The Human Eye Proteome
- 582 Project: Updates on an Emerging Proteome. Proteomics [Internet]. 2018 Mar [cited
- 583 2018 Oct 23];18(5–6):1700394. Available from:
- 584 <http://www.ncbi.nlm.nih.gov/pubmed/29356342>
- 585 13. PRISMA [Internet]. [cited 2018 Oct 24]. Available from: [http://www.prisma-](http://www.prisma-statement.org/PRISMAStatement/Checklist)
- 586 [statement.org/PRISMAStatement/Checklist](http://www.prisma-statement.org/PRISMAStatement/Checklist)
- 587 14. Wilmarth PA, Tanner S, Dasari S, Nagalla SR, Riviere MA, Bafna V, et al. Age-
- 588 Related Changes in Human Crystallins Determined from Comparative Analysis of
- 589 Post-translational Modifications in Young and Aged Lens: Does Deamidation

- 590           Contribute to Crystallin Insolubility? J Proteome Res [Internet]. 2006 Oct [cited 2019  
591           May 14];5(10):2554–66. Available from:  
592           <http://www.ncbi.nlm.nih.gov/pubmed/17022627>
- 593 15.   Hains PG, Truscott RJW. Post-Translational Modifications in the Nuclear Region of  
594           Young, Aged, and Cataract Human Lenses. J Proteome Res [Internet]. 2007 Oct [cited  
595           2019 May 15];6(10):3935–43. Available from:  
596           <http://www.ncbi.nlm.nih.gov/pubmed/17824632>
- 597 16.   Hains PG, Truscott RJW. Proteome analysis of human foetal, aged and advanced  
598           nuclear cataract lenses. PROTEOMICS - Clin Appl [Internet]. 2008 Dec [cited 2019  
599           May 27];2(12):1611–9. Available from:  
600           <http://www.ncbi.nlm.nih.gov/pubmed/21136811>
- 601 17.   Hains PG, Truscott RJW. Age-Dependent Deamidation of Lifelong Proteins in the  
602           Human Lens. Investig Ophthalmology Vis Sci [Internet]. 2010 Jun 1 [cited 2019 May  
603           23];51(6):3107. Available from:  
604           <http://iovs.arvojournals.org/article.aspx?doi=10.1167/iovs.09-4308>
- 605 18.   Hooi MYS, Raftery MJ, Truscott RJW. Racemization of Two Proteins over Our  
606           Lifespan: Deamidation of Asparagine 76 in  $\gamma$ S Crystallin Is Greater in Cataract than in  
607           Normal Lenses across the Age Range. Investig Ophthalmology Vis Sci [Internet]. 2012  
608           Jun 14 [cited 2019 May 23];53(7):3554. Available from:  
609           <http://www.ncbi.nlm.nih.gov/pubmed/22531704>
- 610 19.   Hooi MYS, Raftery MJ, Truscott RJW. Age-dependent deamidation of glutamine  
611           residues in human  $\gamma$ S crystallin: Deamidation and unstructured regions. Protein Sci  
612           [Internet]. 2012 Jul [cited 2019 May 14];21(7):1074–9. Available from:  
613           <http://www.ncbi.nlm.nih.gov/pubmed/22593035>
- 614 20.   Hooi MYS, Raftery MJ, Truscott RJW. Accelerated aging of Asp 58 in  $\alpha$ A crystallin

- 615 and human cataract formation. *Exp Eye Res* [Internet]. 2013 Jan [cited 2019 May  
616 23];106:34–9. Available from:  
617 <https://linkinghub.elsevier.com/retrieve/pii/S0014483512003181>
- 618 21. Fan X, Zhou S, Wang B, Hom G, Guo M, Li B, et al. Evidence of Highly Conserved  $\beta$ -  
619 Crystallin Disulfidome that Can be Mimicked by In Vitro Oxidation in Age-related  
620 Human Cataract and Glutathione Depleted Mouse Lens. *Mol Cell Proteomics*  
621 [Internet]. 2015 Dec [cited 2019 May 15];14(12):3211–23. Available from:  
622 <http://www.ncbi.nlm.nih.gov/pubmed/26453637>
- 623 22. Wang B, Hom G, Zhou S, Guo M, Li B, Yang J, et al. The oxidized thiol proteome in  
624 aging and cataractous mouse and human lens revealed by ICAT labeling. *Aging Cell*  
625 [Internet]. 2017 Apr [cited 2019 May 15];16(2):244–61. Available from:  
626 <http://www.ncbi.nlm.nih.gov/pubmed/28177569>
- 627  
628  
629



630 *Figure 1. Flow diagram of the study selection*

631

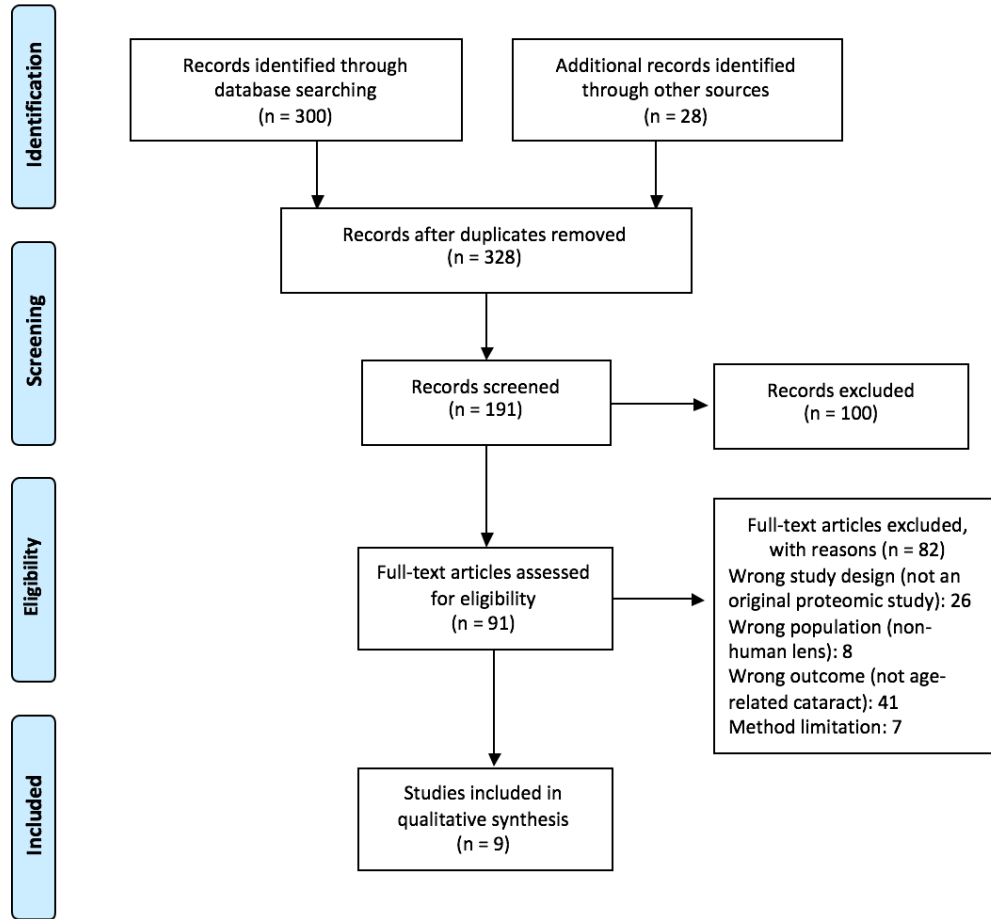

Figure 1. Flow diagram of the study selection
